# Supplementary material
Source: HighWire-hosted journal article supplement (doi:10.1101/rna.029751.111)
Supplement: SuppLegends.docx [file SuppLegends.docx]

**Figure S1. Gene Ontology classification of novel and previously identified genes in *B. mori*.**

Gene ontology (GO) term assignments for novel genes (red) and previously identified genes (purple) based on significant top hits against the NR database, include three main categories: biological process, cellular component and molecular function. The left y-axis indicates the percentage of a specific category of genes that fall into that main category. The right y-axis indicates the number of genes in the same category.

**Figure S2. Characterization of novel *trans*-splicing events in *Bombyx mori*.**

Intact protein-coding domains were generated by *trans*-splicing of two distinct genes. (A) *Cis*-splicing of genes BGIBMGA013060 at chromosome 16 and BGIBMGA002217 at chromosome 6 would encode only part of a RhoGAP domain. However, the *trans*-spliced product from these two genes would encode a protein with an intact and presumably functional RhoGAP domain.

(B) and (C): RNA complementarities between the introns of *trans*-spliced genes were analyzed. RNA secondary structures formed by long base-paring tracts between *trans*-introns in two selected events were observed. Sequencing of isolated mRNA indicated that the splice sites were precise, which are indicated here by red arrows.

**Supplemenatary information**

Table S1. Newly identified genes in the silkworm genome (file type: .xls)

Table S2. Identified novel genes in the silkworm by AUGUSTUS (file type: .xls)

Table S3. Modified gene models in the silkworm (file type: .xls)

Table S4. Identified alternative splicing events in the silkworm (file type: .xls)

Table S5. Alternative splicing events with tandem 3'SS (3 nt distance) in the silkworm (file type: .xls)

Table S6. SR proteins searched from the BGI-M database (file type: .doc)

Table S7. Newly identified *trans*-splicing events of *mod(mdg4)* gene in the silkworm (file type: .xls)

Table S8. SNP information of *trans*-spliced genes in two silkworm lines and their F1 hybrids.

Figure S1. Gene Ontology classification of novel and previously identified genes in *B. mori* (file type: .pdf)

Figure S2. Characterization of novel *trans*-splicing events in *Bombyx mori*.
